# Supplementary material
Source: publisher site journal article supplement (https://www.dovepress.com/get_supplementary_file.php?f=396686.docx)
Supplement: Supplementary file 1 [file get_supplementary_file.php]

**Supplementary file 1:** Questionnaire - Awareness, perception and utilization of skin lightening agents among females of Asmara

**The State of Eritrea**

**Ministry of Health & Eritrean Pharmaceutical Association**

**Awareness, Perception and Utilization of Skin Lightening Agents among Females of Asmara in 2021**

The collected data will be handled in strict confidence and will only be used for the purpose of this study.

| **Identifiers** | |
| --- | --- |
| Date of Interview  Code of Beauty Salon  Code of Study Participant  Code of Interview outcome (1=Completed / 2=Partially Completed / 3=Unwilling to Participate)  Reason for not participating in the study  Participant signature | ________ / ________ / 2021 |

| Name and Code of Interviewer  ______________________________________ | Name and Code of Supervisor  ________________________________ | Code of Date Enterer |
| --- | --- | --- |

| **Socio-demographic characteristics** | | | |
| --- | --- | --- | --- |
| **No.** | **Indicators** | **Coding categories** | **Skip** |
| 101 | Age in completed years |  |  |
| 102 | Ethnicity | Tigrigna1  Tigre2  Saho3  Bilen4  Afar5  Nara6  Kunama7  Hidareb8  Rashaida9  Other *(please specify)*10 |  |
| 103 | Religion | Christian1  Muslim2  Other *(please specify)*3 |  |
| 104 | Highest level of education | ___________________ |  |
| 105 | Marital status | Married1  Divorced2  Widowed3  Single4 |  |
| 106 | Occupation | Employed1  Unemployed2  Housewife3  Student4  Other *(please specify)*5 |  |
| 107 | Chronic illness | Yes1  No2 | 109 |
| 108 | What kind of chronic illness do you have?  ***(Multiple answers are possible)*** | DiabetesA  HypertensionB  Asthma or other respiratory illnessesC  Cardiac diseaseD  HIVE  Other (*Specify*) X |  |
| 109 | Pregnancy | Yes1  No2 |  |
| 110 | Residence address (subzone) | North West1  North East2  City Center3  South West4  South East5 |  |

| **General awareness on skin lightening agents and their adverse effects** | | | |
| --- | --- | --- | --- |
| **No.** | **Questions** | **Coding categories** | **Skip** |
| 201 | Have you ever heard of skin lightening agents (SLAs)? | Yes1  No2 | **End of Interview** |
| 202 | Which skin lightening agents do you know? | ____________________________  ____________________________  ____________________________ |  |
| 203 | Source from where you heard/knew  about skin lightening agents  ***(Multiple answers are possible)*** | Family membersA  FriendsB  Healthcare professionalsC  MediaD  Cosmetic shop attendantE  Others *(please specify)*X  _______________________________ |  |
| 204 | Can use of skin lightening agents have negative health consequences? | Yes1  No2  Don’t know3 | **301** |
| 205 | What negative health consequences could be caused by the use of skin lightening agents?  ***(Multiple answers are possible)*** | Hyper-pigmentation of cheeks/faceA  Skin thinningB  Acne/Dark SpotsC  DepigmentationD  Burnings and Skin irritationE  Fragile skin/skin peelingF  RashesG  Withdrawal syndromeH  Other *(please specify)*X  _______________________________ |  |

| **Perception on skin lightening agents and their effects**  **Instruction:** Following you will be provided with a set of ideas related to cosmetics. There is no right or wrong answer, just kindly indicate your honest opinions. | | |
| --- | --- | --- |
| **No.** | **Statements** | **Coding categories** |
| 301 | Skin lightening agents can make someone/people look trendy and fashionable | Strongly Agree1  Agree2  Neutral3  Disagree4  Strongly Disagree5 |
| 302 | Skin lightening agents can help users to achieve and succeed in their career (employment opportunities) | Strongly Agree1  Agree2  Neutral3  Disagree4  Strongly Disagree5 |
| 303 | Skin lightening agents can help to attain high social class/rank (wealth) | Strongly Agree1  Agree2  Neutral3  Disagree4  Strongly Disagree5 |
| 304 | Skin lightening agents can make someone light colored and/or look more like the whites | Strongly Agree1  Agree2  Neutral3  Disagree4  Strongly Disagree5 |
| 305 | Skin lightening agents can remove skin pimples and blemishes so that to obtain a smooth skin | Strongly Agree1  Agree2  Neutral3  Disagree4  Strongly Disagree5 |
| 306 | Skin lightening agents can help to acquire a desired marriage partner | Strongly Agree1  Agree2  Neutral3  Disagree4  Strongly Disagree5 |
| 307 | Skin lightening agents can help someone to be popular among peers | Strongly Agree1  Agree2  Neutral3  Disagree4  Strongly Disagree5 |
| 308 | Skin lightening agents can make one look beautiful. | Strongly Agree1  Agree2  Neutral3  Disagree4  Strongly Disagree5 |
| 309 | White skin is more attractive than dark skin | Strongly Agree1  Agree2  Neutral3  Disagree4  Strongly Disagree5 |
| 310 | Skin lightening agents are safe and do not contain harmful ingredients. | Strongly Agree1  Agree2  Neutral3  Disagree4  Strongly Disagree5 |
| 311 | The use of skin lightening products would make  others stigmatize you. | Strongly Agree1  Agree2  Neutral3  Disagree4  Strongly Disagree5 |
| 312 | I would continuously use skin lightening agent(s) for beautification despite having negative health  consequences. | Strongly Agree1  Agree2  Neutral3  Disagree4  Strongly Disagree5 |

| **Utilization of skin lightening agents** | | | |
| --- | --- | --- | --- |
| **No.** | **Questions** | **Coding categories** | **Skip** |
| 401 | Have you ever used skin lightening agent(s)? | Yes1  No2 | **422** |
| 402 | Who influenced/encouraged you to use skin lightening agents?  ***(Multiple answers are possible)*** | FriendsA  Family members/relativesB  On my own willC  Mass mediaD  DermatologistE  Other healthcare professionalsF  Other *(please specify)*X  _______________________________ |  |
| 403 | Are you currently using skin lightening agent(s)? | Yes1  No2 | **405** |
| 404 | Why did you stop using it?  ***(Multiple answers are possible)*** | Economic reasonsA  Experienced harmful effectsB  Upon recommendation C  Have not experienced any change on my skin tone D  Other *(please specify)*X |  |
| 405 | Age of start (using skin lightening agents) | ___________________ |  |
| 406 | For how long did you use skin lightening agent? | Years  Months  Days |  |
| 407 | What kinds of skin lightening agents have you used?  ***(Multiple answers are possible)*** | CreamsA  SoapsB  Locally concoctedC  PowdersD  Other *(please specify)*X  _______________________________ |  |
| 408 | How do you choose which product to use?  ***(Multiple answers are possible)*** | Brand nameA  Checking the ingredientsB  AdvertisementsC  Friends recommendationD  Cosmetic shop attendant’s recommendationE  Healthcare professionals’ recommendationF  Sample (Prior testing)G  Other *(please specify)*X |  |
| 409 | Do you know the name of the product(s) you are using/were using? | Yes1  No2 |  |
| 409A | State it/show me if it is with you  *(the investigator can display pictures/sample to*  *identify/confirm)* | 1.____________________________  2.____________________________  3.____________________________  4.____________________________  5.____________________________ |  |
| 410 | Do you know the name of the active ingredients you are using? | Yes1  No2 |  |
| 410A | State it/show me if it is with you  *(the investigator can display pictures/sample to*  *identify/confirm)* | 1.____________________________  2.____________________________  3.____________________________  4.____________________________  5.____________________________ |  |
| 411 | Frequency of use  ***(Multiple answers are possible)*** | DailyA  Every other dayB  Once weeklyC  OccasionallyC  Other *(please specify)*X  _______________________________ | _______  _______  _______  _______  _______ |
| 412 | Where do you normally acquire these product(s)?  ***(Multiple answers are possible)*** | PharmacyA  Cosmetic shopB  SupermarketC  Locally concoctedD  Other *(please specify)*X  _______________________________ |  |
| 413 | What is/are your main reason(s) for using skin lightening agents?  ***(Multiple answers are possible)*** | To remove a precise skin markA  To harmonize the skin tone of my faceB  To change the skin colorC  To remove melasmaD  To remove acneE  To have a softer skinF  To look more beautifulG  Prescribed by a healthcare professional for a medical reason H  Other *(please specify)*X  _______________________________ |  |
| 414 | Do you read any product information before using skin lightening agents? | Yes1  No2  Instruction is not provided 3 | **416** |
| 415 | Which product information(s) do you read?  ***(Multiple answers are possible)*** | Name of the productA  Contents/Ingredients of the productB  BenefitsC  Instruction for use of the productD  Expiration dateE  Other *(please specify)*X  _______________________________ |  |
| 416 | Do you recommend using skin lightening agents to other girls? | Yes1  No2 | **418** |
| 417 | What reasons influenced you not to recommend? | I have witnessed its harmful effectsA  Its negative effects outweigh its benefitsB  I do not see any benefitsC  Other *(please specify)*X  _______________________________ |  |
| 418 | Have you ever experienced any adverse effects while using skin lightening agents? | Yes1  No2  I do not remember3 | **421** |
| 419 | What adverse effect(s) have  you experienced?  ***(Multiple answers are possible)*** | Hyper-pigmentation of cheeks/faceA  Skin thinningB  Acne/Dark SpotsC  DepigmentationD  Burnings and Skin irritationE  Fragile skin/skin peelingF  RashesG  Withdrawal syndromeH  Other *(please specify)*X  _______________________________ |  |
| 420 | What did you do after you experienced the adverse effects?  ***(Multiple answers are possible)*** | Discontinued the SLAA  Changed to other SLA productB  Went to hospital/pharmacy C  Used a medication to counter act D  Continued the use of SLAE  Other *(please specify)*X  _______________________________ |  |
| 421 | Are you satisfied with the outcomes/use of skin lightening agents? | Satisfied1  Partially satisfied2  Not satisfied at all3  No comment4 |  |
| 422 | Do you plan to use skin lightening agents in the future? | Yes1  No2  I don’t know3 |  |

Thank You!

**Supplementary file 2:** List of packaged products and natural ingredients claimed to be used for skin lightening

| **S.N** | **Name of the product/ natural ingredient** | **Has skin lightening effect** | **Contains harmful ingredient** | | **Name of harmful ingredient** |
| --- | --- | --- | --- | --- | --- |
| **Packaged products** | | | | | |
| 1 | 72-Hours Lotion | Yes | No | | - |
| 2 | African Queen | Yes | No | | - |
| 3 | Aneeza | Yes | No | | - |
| 4 | Beauty | Unidentified | - | | - |
| 5 | Betamethasone | Yes | Yes | | Betamethasone |
| 6 | Bio-clear | Yes | No | | - |
| 7 | Blackseed oil | No | No | | - |
| 8 | BT | Yes | Yes | | Clobetasole propionate |
| 9 | Carolight | Yes | Yes | | Hydroquinone |
| 10 | Carotone | Yes | Yes | | Hydroquinone |
| 11 | Carowhite | Yes | Yes | | Hydroquinone |
| 12 | Shirley beauty cream | Yes | No | | - |
| 13 | Civic Lemon | Yes | Yes | | Clobetasole propionate |
| 14 | Clear tone | Yes | Yes | | Clobetasole propionate |
| 15 | Coconut butter | No | No | | - |
| 16 | Colgate | No | No | | - |
| 17 | Diana | Yes | No | | - |
| 18 | Dr. Clear | Yes | No | | - |
| 19 | Dr. Miracle | Yes | No | | - |
| 20 | Dulca | Unidentified | - | | - |
| 21 | Fair & Lovely | Yes | No | | - |
| 22 | Foundation (Unknown brand) | No | No | | - |
| 23 | Foundation Baby medical | No | No | | - |
| 24 | Foundation Fit Me | No | No | | - |
| 25 | Foundation L'Oreal | No | No | | - |
| 26 | Foundation MAC | No | No | | - |
| 27 | Foundation Maybelene | No | No | | - |
| 28 | Foundation Super | No | No | | - |
| 29 | Foundation Zebra | No | No | | - |
| 30 | Parley Goldie | Yes | No | | - |
| 31 | Gold Beauty | Unidentified | - | | - |
| 32 | Gold Skin | Yes | No | | - |
| 33 | Kanza whitening soap | Yes | No | | - |
| 34 | Kelly pearl cream | Yes | No | | - |
| 35 | Peau Jaune | Yes | Yes | | Clobetasole propionate |
| 36 | Layla Cream | Yes | No | | - |
| 37 | Liquid soap Aloe Vera | No | No | | - |
| 38 | Liquid Soap Neutrogena | No | No | | - |
| 39 | Lucid | Yes | No | | - |
| 40 | Malica | Yes | No | | - |
| 41 | Milano cream | Yes | Yes | | Hydroquinone |
| 42 | Natural Face | Yes | No | | - |
| 43 | Natural Secret | Yes | No | | - |
| 44 | Natural Garlic | Yes | No | | - |
| 45 | New Face | Yes | No | | - |
| 46 | New Light | Yes | No | | - |
| 47 | Noor | Yes | No | | - |
| 48 | Noor Gold | Yes | No | | - |
| 49 | Olay cream | Yes | No | | - |
| 50 | Paris fairness cream | Yes | No | | - |
| 51 | Perfect white | Yes | No | | - |
| 52 | Powder (MAC) | No | No | | - |
| 53 | Powder (Unknown brand) | Unidentified | - | | - |
| 54 | Powder Green | Unidentified | - | | - |
| 55 | Powder Number 3 | No | No | | - |
| 56 | Powder Olivia | No | No | | - |
| 57 | Pure Skin | Yes | No | | - |
| 58 | Rose Cream | No | No | | - |
| 59 | Sandani (Chandni) | Yes | No | | - |
| 60 | Scrub Aloe Vera | Yes | No | | - |
| 61 | Scrub Aloe+Honey | Yes | No | | - |
| 62 | Scrub Cucumber | Yes |  | No | - |
| 63 | Scrub Honey | No |  | No | - |
| 64 | Scrub Honey La'Fresh | No |  | No | - |
| 65 | Scrub Lemon | Yes |  | No | - |
| 66 | Scrub Strawberry | Yes |  | No | - |
| 67 | Shiruq | Yes |  | No | - |
| 68 | Skin Glow | Yes |  | No | - |
| 69 | Soap (Unknown brand) | Unidentified |  | - | - |
| 70 | Soap Anti-acne | Unidentified |  | - | - |
| 71 | Soap Ayurveda | Yes |  | No | - |
| 72 | Soap Cucumber | Yes |  | No | - |
| 73 | Soap Honey + Milk | Yes |  | No | - |
| 74 | Soap Johnsons | No |  | No | - |
| 75 | Soap Kojic | Yes |  | No | - |
| 76 | Soap Mango | Unidentified |  | - | - |
| 77 | Soap Papaya | Yes |  | No | - |
| 78 | Soap Telebeidu | Unidentified |  | - | - |
| 79 | Soap Turmeric | Yes |  | No | - |
| 80 | Soap Vegie | Unidentified |  | - | - |
| 81 | Vaseline | No |  | No | - |
| 82 | Vitamin Beauty | Unidentified |  | - | - |
| 83 | White Face | Yes |  | No | - |
| 84 | White Lemon | Unidentified |  | - | - |
| 85 | White Secret | Yes |  | No | - |
| 86 | Yellow vaseline | Unidentified |  | - | - |
| **Natural ingredients** | | | |  | |
| 87 | Avocado | No |  | No | - |
| 88 | Baking Soda | Yes |  | No | - |
| 89 | Banana | Yes |  | No | - |
| 90 | Blackseed | No |  | No | - |
| 91 | Butter | No |  | No | - |
| 92 | Cinnamon | Yes |  | No | - |
| 93 | Coffee | Yes |  | No | - |
| 94 | Cucumber | Yes |  | No | - |
| 95 | Egg | Yes | No | | - |
| 96 | Gaba | No | No | | - |
| 97 | Green Tea | Yes | No | | - |
| 98 | Hienna | Yes | No | | - |
| 99 | Honey | Yes | No | | - |
| 100 | Lemon | Yes | No | | - |
| 101 | Likhay | No | No | | - |
| 102 | Milk | Yes | No | | - |
| 103 | Oats | Yes | No | | - |
| 104 | Olive Oil | Yes | No | | - |
| 105 | Orange peel | Yes | No | | - |
| 106 | Papaya | Yes | No | | - |
| 107 | Potato | Yes | No | | - |
| 108 | Rice | No | No | | - |
| 109 | Rosemary | Yes | No | | - |
| 110 | Sugar | Yes | No | | - |
| 111 | Tomatos | Yes | No | | - |
| 112 | Turmeric | Yes | No | | - |
| 113 | Yeast | No | No | | - |
| 114 | Yogurt | No | No | | - |
| 115 | Zucchini | No | No | | - |
